# Supplementary material
Source: PubMed Central journal article supplement (PMC3922072)
Supplement: NIHMS536078-supplement-Table.pdf [file NIHMS536078-supplement-Table.pdf]

| Table 1 Supplementary Patients characteristics |                           |
|------------------------------------------------|---------------------------|
|                                                | Number (percent or range) |
| <b>Male/Female</b>                             | 24/6 (80/20)              |
| <b>Median Age</b>                              | 60 (range 36-80)          |
| <b>ECOG</b>                                    |                           |
| 0                                              | 23 (77)                   |
| 1                                              | 7 (23)                    |
| <b>Tumor Primary Site</b>                      |                           |
| Melanoma                                       | 7 (23)                    |
| GI                                             | 7 (23)                    |
| Renal                                          | 5 (17)                    |
| Prostate                                       | 5 (17)                    |
| Lung                                           | 3 (10)                    |
| Other                                          | 3 (10)                    |
| <b>Sites of Metastases</b>                     |                           |
| Lymph Node                                     | 15 (50)                   |
| Lung                                           | 12 (40)                   |
| Liver                                          | 10 (33)                   |
| Bone                                           | 7 (23)                    |
| Other                                          | 14 (47)                   |
| <b>Median number of metastatic sites</b>       | 2 (range 1 – 4)           |
| Surgery                                        | 21 (70)                   |
| Radiation                                      | 14 (47)                   |
| Chemotherapy                                   | 19 (63)                   |
| Immunotherapy                                  | 13 (43)                   |
| Targeted Agents                                | 9 (30)                    |
| Hormonal Therapy                               | 5 (17)                    |
| <b>Median number of prior treatments</b>       | 2 (Range 0-8)             |
